# Supplementary material for: Nasal Acai Polysaccharides Potentiate Innate Immunity to Protect against Pulmonary Francisella tularensis and Burkholderia pseudomallei Infections
Source: PLOS journal article supplement (doi:10.1371/journal.ppat.1002587), 2012-03-15
Supplement: S5 (10.1371/journal.ppat.1002587.s005) [file journal.ppat.1002587.s005]

**Table S3.** Acai PS does not induce cytotoxicity in murine and human macrophages infected with type A *F. tularensis*<sup>a</sup>.

|                   | % Cytotoxicity |                  |                   |
|-------------------|----------------|------------------|-------------------|
|                   | Media          | 10 µg/ml Acai PS | 100 µg/ml Acai PS |
| RAW264.7 Cells    | 7.57 (0.42)    | 8.72 (1.38)      | 7.68 (0.24)       |
| Mouse BMDM        | 11.96 (0.71)   | 9.79 (0.12)      | 10.88 (2.83)      |
| Human Macrophages | 3.38 (0.14)    | 4.08 (1.62)      | 3.78 (0.44)       |

<sup>a</sup>Cells were treated or not with Acai PS 16 hr prior to infection with *F. tularensis* SchuS4 (MOI~30).

<sup>b</sup>Cytotoxicity was measured by LDH release at 20 hr after infection and expressed as a percentage of LDH release by Triton X-100 detergent.

Standard deviation in parentheses.
